# Supplementary material for: Fluorescent carbon dots from birch leaves for sustainable electroluminescent devices
Source: Royal Society of Chemistry journal article supplement (doi:10.1039/d3gc03827k), 2023-01-01
Supplement: d3gc03827k1.pdf [file d3gc03827k1.pdf]

## Supporting Information

### Fluorescent Carbon Dots from Birch Leaves for Sustainable Electroluminescent Devices

Shi Tang<sup>a</sup>, Yongfeng Liu<sup>a,b</sup>, Henry Opoku<sup>a</sup>, Märta Gregorsson<sup>a</sup>, Peijuan Zhang<sup>c</sup>, Etienne Auroux<sup>a</sup>, Dongfeng Dang<sup>c</sup>, Anja-Verena Mudring<sup>d</sup>, Thomas Wågberg<sup>a</sup>, Ludvig Edman<sup>a,e,\*</sup> and Jia Wang<sup>1\*</sup>

<sup>a</sup> Department of Physics, Umeå University, SE-90187 Umeå, Sweden.

<sup>b</sup> College of Physical Science and Technology, Yangzhou University, Yangzhou 225002, P. R. China.

<sup>c</sup> School of Chemistry, Xi'an Key Laboratory of Sustainable Energy Material Chemistry, Xi'an Jiao Tong University, Xi'an 710049, China

<sup>d</sup> Intelligent Advanced Materials (iAM), Department of Biological and Chemical Engineering and iNANO, Aarhus University, 8000 Aarhus C, Denmark

<sup>e</sup> Wallenberg Initiative Materials Science for Sustainability, Department of Physics, Umeå University, SE-90187 Umeå, Sweden

\*Corresponding authors. E-mail: [ludvig.edman@umu.se](mailto:ludvig.edman@umu.se) and [jia.wang@umu.se](mailto:jia.wang@umu.se)

#### Fatty acids:

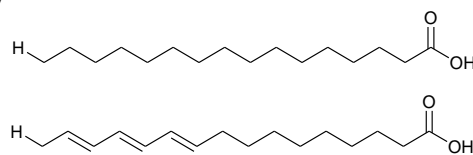

#### Glycoside:

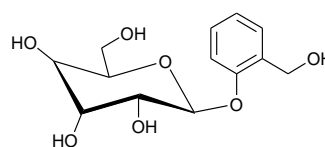

#### Flavonoids:

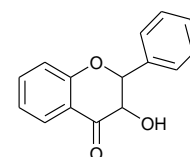

#### Phenolic acid:

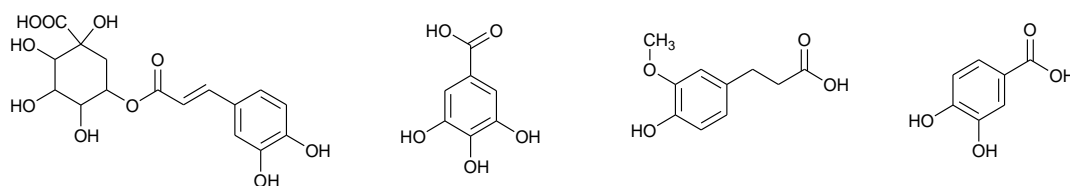

**Figure S1.** A selection of the biomolecular species commonly present in birch leaves and their chemical structures. The chemical structures of pheophytin a and chlorophyll a are depicted in the lower right-hand part of Figures 1(e) and 1(f), respectively.

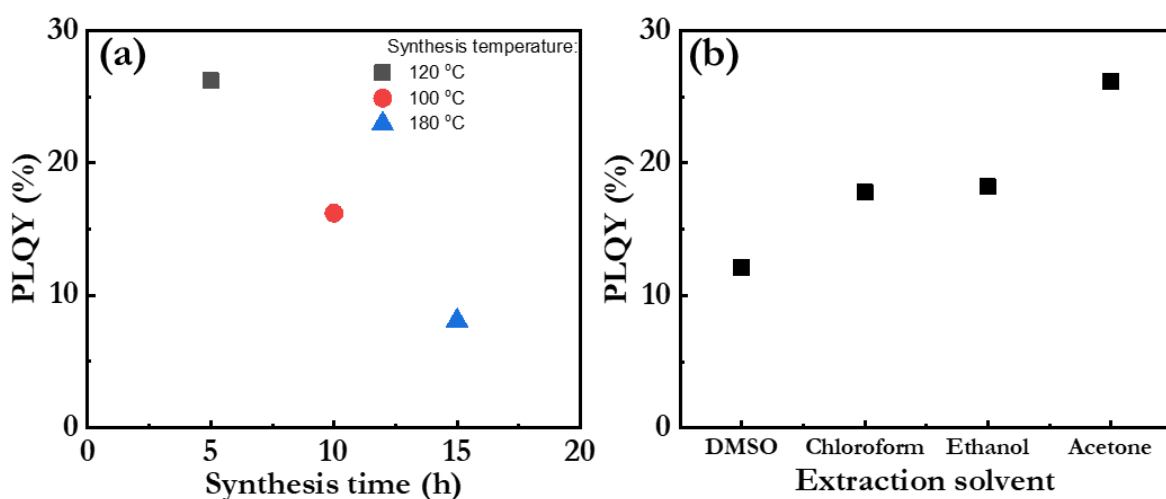

**Figure S2.** The photoluminescence quantum yield (PLQY) of the synthesized bio-CDs: (a) as a function of the reaction time (see  $x$ -axis) and the reaction temperature (see inset) in acetone; (b) as a function of extraction solvents when other reaction parameters remain unchanged (i.e., 120 °C for 5 h).

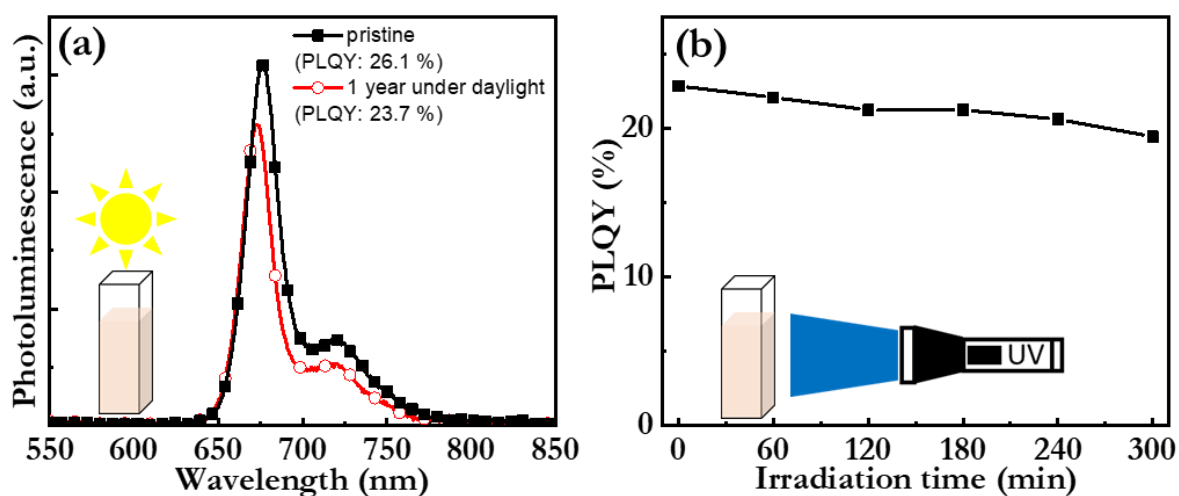

**Figure S3.** The photostability of the bio-CD-in-ethanol solution (solute concentration = 1.6 mg/L) under ambient air, during exposure to (a) daylight and (b) UV irradiation with a power density of 230 W/m<sup>2</sup> and a peak wavelength of 365 nm.

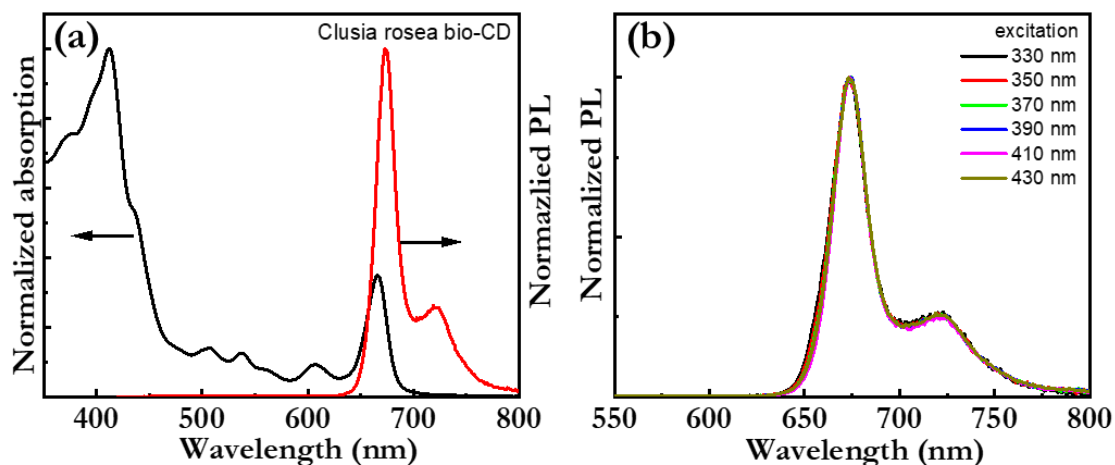

**Figure S4.** (a) The absorption and PL spectra, and (b) the PL spectrum as a function of excitation wavelength, for bio-CDs synthesized from leaves from the plant “Clusia rosea”.

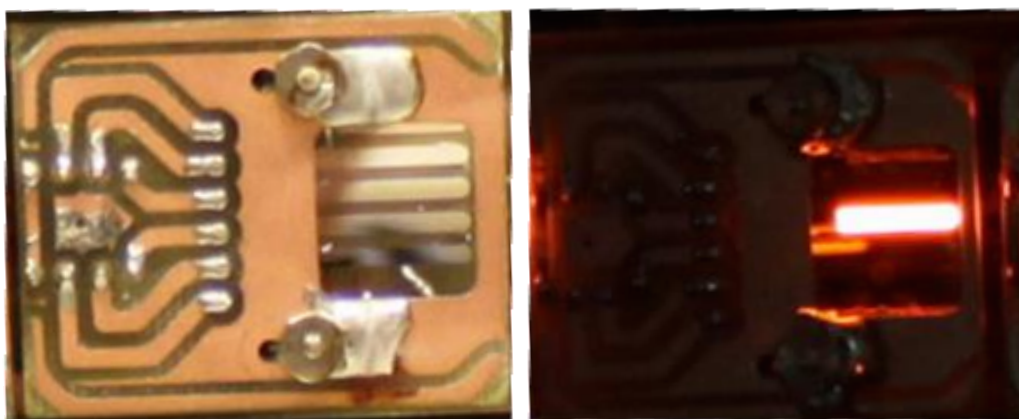

**Figure S5.** Photographs of an LEC device in the idle off state (left) and during deep-red and narrow-band light emission (right).

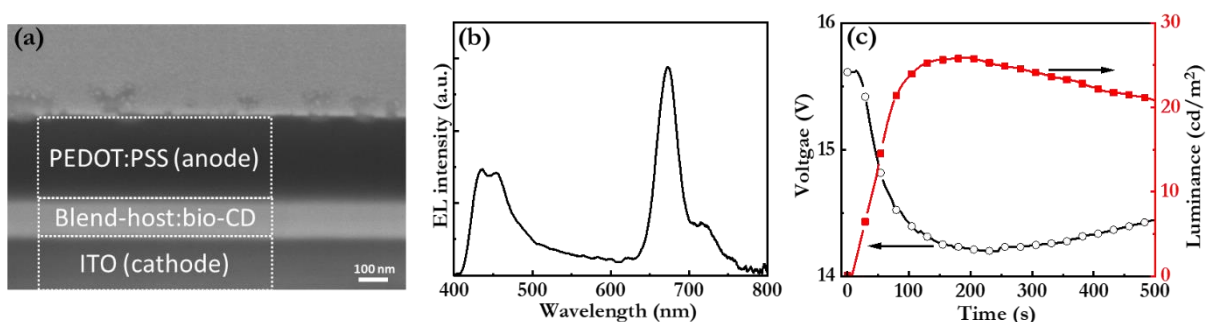

**Figure S6.** (a) A cross-sectional SEM image of the ITO/blend-host:bio-CD/PEDOT:PSS LEC device structure. (b) The steady-state EL spectrum and (c) the temporal evolution of the luminance and the voltage for the LEC with a spray-coated PEDOT:PSS top electrode. The device was driven by a constant current density of  $154 \text{ mA/cm}^2$ .
